# Supplementary material for: FMRP Modulates Neural Differentiation through m6A-Dependent mRNA Nuclear Export
Source: PubMed Central journal article supplement — Cell Rep. Author manuscript; Available in PMC 2019 Aug 8. (PMC6687293; doi:10.1016/j.celrep.2019.06.072), 2019-07-23
Supplement: NIHMS1535564-supplement-1.pdf [file NIHMS1535564-supplement-1.pdf]

**Cell Reports, Volume 28**

**Supplemental Information**

**FMRP Modulates Neural Differentiation  
through m<sup>6</sup>A-Dependent mRNA Nuclear Export**

**Brittany M. Edens, Caroline Vissers, Jing Su, Saravanan Arumugam, Zhaofa Xu, Han Shi, Nimrod Miller, Francisca Rojas Ringeling, Guo-li Ming, Chuan He, Hongjun Song, and Yongchao C. Ma**

Figure S1

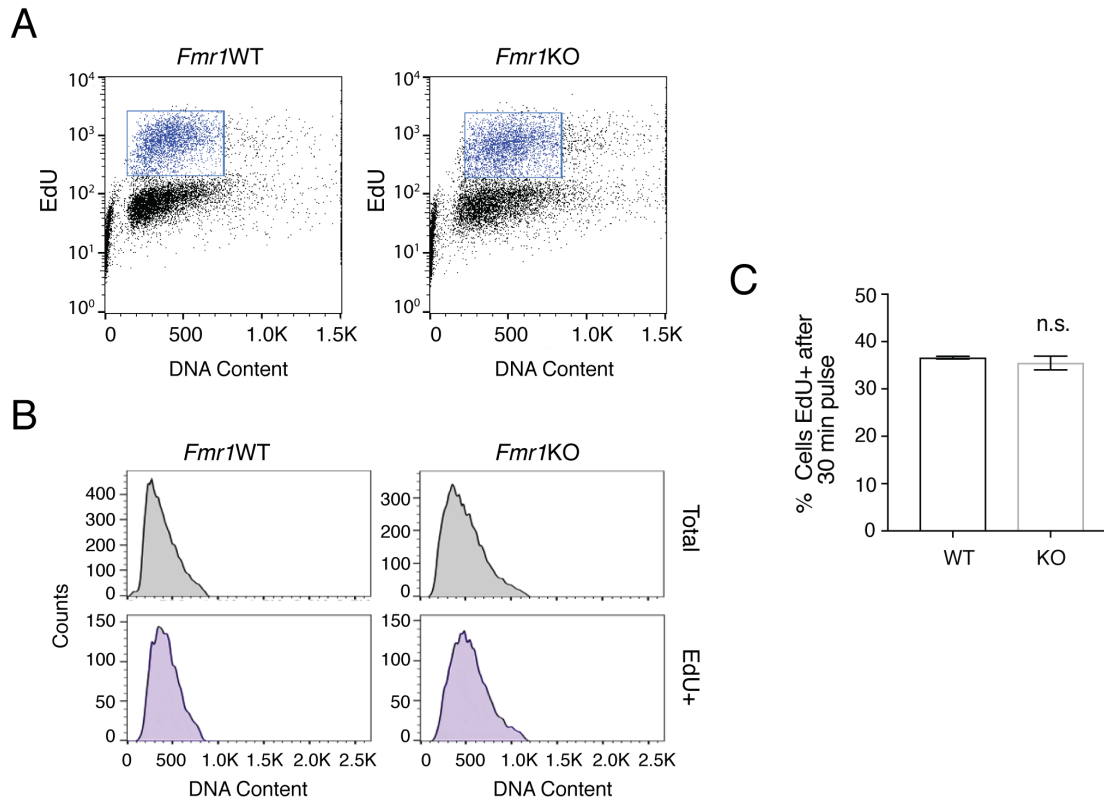

**Figure S1: EdU incorporation does not differ between WT and *Fmr1*KO NPCs, Related to Figure 1.**

**A.** FACS analysis of EdU uptake in WT and *Fmr1*KO NPCs. Cells labeled during a 30 minute EdU pulse are shown in blue.

**B.** Histograms comparing WT and *Fmr1*KO NPCs. The number and distribution of NPCs following a 30 minute EdU pulse is similar between WT and *Fmr1*KO.

**C.** There is no significant difference in the number of EdU+ cells following a thirty-minute pulse between WT and *Fmr1*KO NPCs ( $p=0.4623$ ;  $n=6$ WT,  $6$ KO).

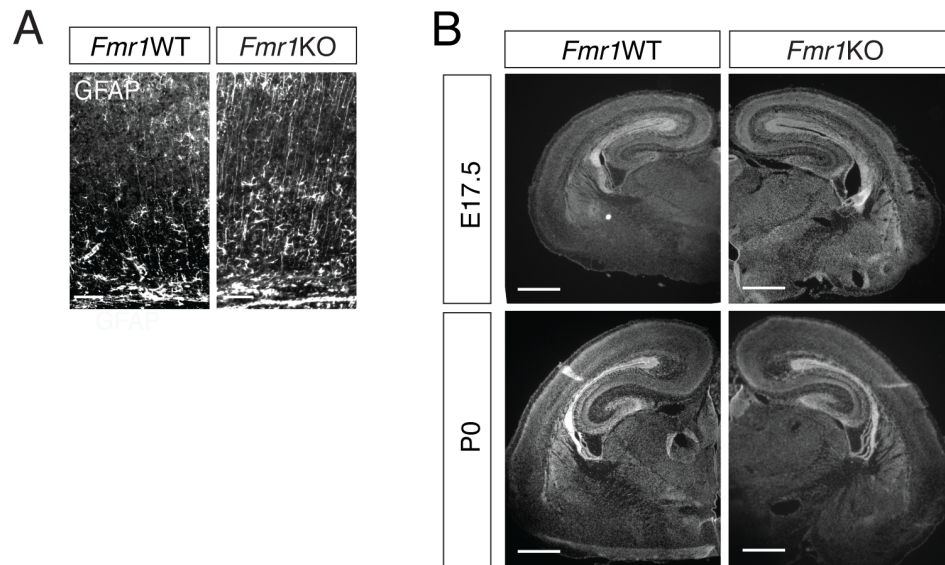

**Figure S2: Radial glial fibers persist into postnatal stages in *Fmr1*KO mice, Related to Figure 2.**

**A.** Immunostaining of GFAP in WT and *Fmr1*KO cortex at P7. Scale bar = 50 $\mu$ m.

**B.** DAPI staining of E17.5 (top) and P0 (bottom) *Fmr1*WT and *Fmr1*KO mouse cortex. Scale bar = 200 $\mu$ m.

Figure S3

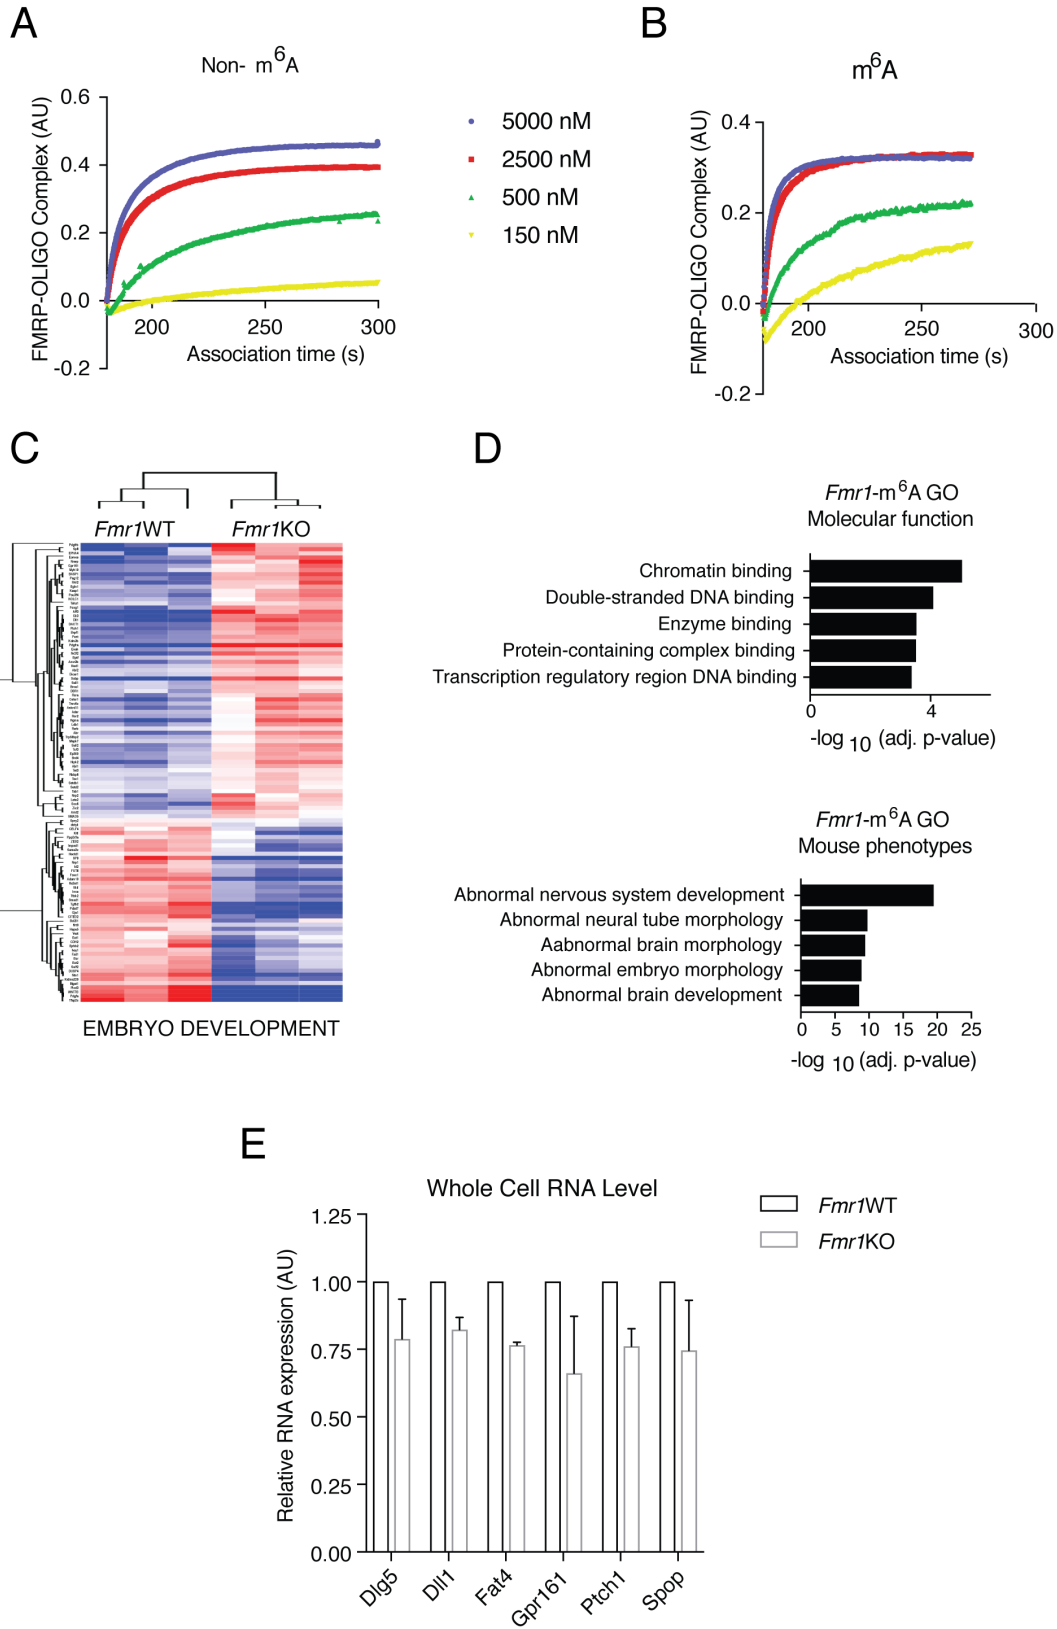

**Figure S3: Binding and gene expression analysis, Related to Figure 3.**

**A.** and **B.** Bio-layer interferometry kinetic association analysis of FMRP binding to methylated (A) or non-methylated (B) RNA. Results are averaged from three independent experiments.

**C.** Heat map comparing WT and *Fmr1*KO nuclear expression of genes related to embryo development.

**D.** Gene ontology analysis of transcripts that are both m<sup>6</sup>A-modified and differentially expressed in *Fmr1*KO nucleus. Molecular function (top) and mouse phenotypes (bottom) are shown.

**E.** RT-qPCR analysis of m<sup>6</sup>A-tagged FMRP target mRNAs in whole cell WT and *Fmr1*KO RNAs (n=3WT, 3KO).

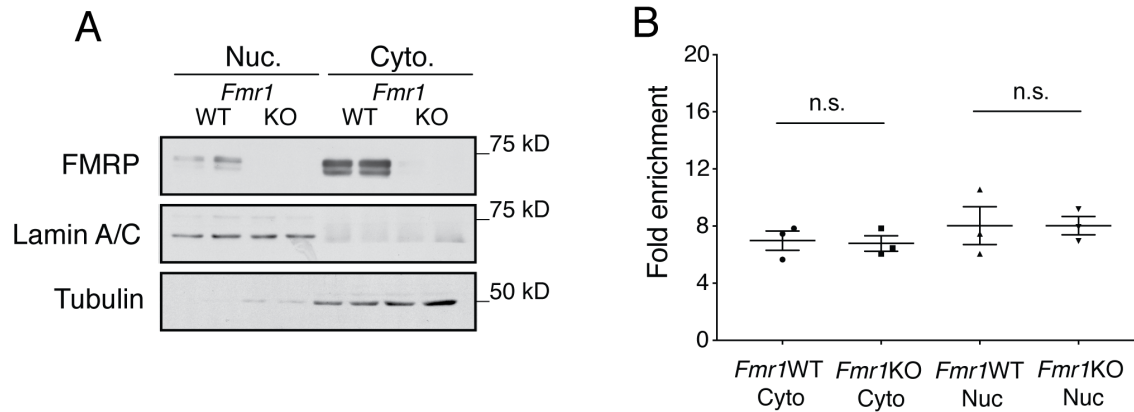

**Figure S4: Nuclear fractions are efficiently separated from the cytoplasm in *Fmr1* samples, Related to Figures 3 and 4.**

**A.** Representative Western blot demonstrating nuclear and cytoplasmic fraction separation. Lamin A/C and Tubulin serve as positive controls for nuclear and cytoplasmic fractions, respectively.

**B.** Comparison of nuclear (*U1*) and cytoplasmic (*beta-actin*) marker enrichment detected by RT-qPCR between fractions from WT and *Fmr1*KO NPCs prepared for RNA sequencing. Only nuclear RNA preparations with high *U1* expression (~8-fold nuclear increase over cytoplasm) and low *beta-actin* expression (~7-fold cytoplasmic increase over nucleus) were used for analysis. There are no statistical differences between different preparations of nuclear ( $p=0.9974$ ;  $n=3$ WT, 3KO) or cytoplasmic samples ( $p=0.8263$ ;  $n=3$ WT, 3KO).

**Table S1, Primer Information, related to STAR Methods**

Primer sequences for RT-qPCR analysis of Hedgehog- and Notch-related RNAs.

| <b>GENE</b>                          | <b>PRIMER SEQUENCE</b> |                          |
|--------------------------------------|------------------------|--------------------------|
| <i>Dll1</i>                          | Forward                | CAGGACCTTCTTTTCGCGTATG   |
|                                      | Reverse                | AAGGGGAATCGGATGGGGTT     |
| <i>Ptch1</i>                         | Forward                | AAAGAACTGCGGCAAGTTTTTG   |
|                                      | Reverse                | CTTCTCCTATCTTCTGACGGGT   |
| <i>Dlg5</i>                          | Forward                | AAAGTGGACTGTACCTCTCTTCG  |
|                                      | Reverse                | GTGCCGGTTCTTTTCTGTGAT    |
| <i>Gpr161</i>                        | Forward                | CTCACGCTTGGGGTCATTG      |
|                                      | Reverse                | GAGCCAGATGTAGACGAGAGC    |
| <i>Spop</i>                          | Forward                | CCACCTCCGGCAGAAATGTC     |
|                                      | Reverse                | CCTCCCGGCAAAAATAAAGT     |
| <i>Fat4</i>                          | Forward                | CAGTGGTGATCCAGGTACGG     |
|                                      | Reverse                | TCATGCGCTGTCACGGAAATA    |
| <i>Snora3</i>                        | Forward                | TCCGAGGCTAGAGTCACG       |
|                                      | Reverse                | ATATGTCACTAACCTGGTACTG   |
| <i>U1</i>                            | Forward                | GATACCATGATCACGAAGGTGGTT |
|                                      | Reverse                | CACAAATTATGCAGTCGAGTTTCC |
| <i>Actb</i><br>( <i>beta-actin</i> ) | Forward                | GCGAGCACAGCTTCTTTGC      |
|                                      | Reverse                | TCGTCATCCATGGCGAACT      |
